# Supplementary material
Source: PubMed Central journal article supplement (PMC2836072)

## **Cerebrospinal Fluid Steroidomics: Are Bioactive Bile Acids Present in Brain?**

**Michael Ogundare<sup>1</sup>, Spyridon Theofilopoulos<sup>2</sup>, Andrew Lockhart<sup>3</sup>, Leslie J. Hall<sup>4</sup>, Ernest Arenas<sup>2</sup>, Jan Sjövall<sup>2</sup>, A. Gareth Brenton<sup>1</sup>, Yuqin Wang<sup>1</sup>, William J. Griffiths<sup>1</sup>.**

<sup>1</sup>Institute of Mass Spectrometry, School of Medicine, Grove Building, Swansea University, Singleton Park, Swansea SA2 8PP, UK.

<sup>2</sup>Department of Medical Biochemistry and Biophysics, Karolinska Institutet, Stockholm SE-17177, Sweden.

<sup>3</sup>Translational Medicine, GlaxoSmithKline R&D China, Box No 128, Addenbrookes Hospital, Cambridge CB2 2GG, UK.

<sup>4</sup>Strategic & External Alliances-Genetics, GlaxoSmithKline, 5 Moore Drive, Research Triangle Park, NC 27709, USA.

### **Supplementary Figure 2. Analysis of the nuclear receptor activational capacity of acidic intermediates of bile acid biosynthesis.**

(a) Analysis of luciferase activity in SN4741 cells transfected with an LXR-responsive luciferase reporter construct (LXRE) and LXR $\alpha$  as indicated, and stimulated for 24 h with 22R-hydroxycholesterol (10  $\mu$ M) or the acidic compounds indicated.

(b) Analysis of luciferase activity in SN4741 cells transfected with an FXR-responsive luciferase reporter construct (FXRE) and FXR as indicated, and stimulated for 24h with chenodeoxycholic acid (CDCA; 10  $\mu$ M) or the acidic compounds indicated.

(c) Analysis of luciferase activity in SN4741 cells transfected with a DR5-responsive luciferase reporter construct and NURR1 as indicated, and stimulated for 24h with 9-cis-retinoic acid (9-cis-RA; 10  $\mu$ M) or the acidic compounds indicated.

For all (a), (b), and (c) firefly luciferase activity was normalized to Renilla luciferase activity, and the values are expressed as fold activation over the normalised basal LXRE-Luc activity (or FXRE-Luc or DR5-Luc) activity set to 1. Data are means  $\pm$  SEM (n=3), \*P<0,05, \*\*P<0,01 compared to vehicle treatment.

**Fig. S2a**

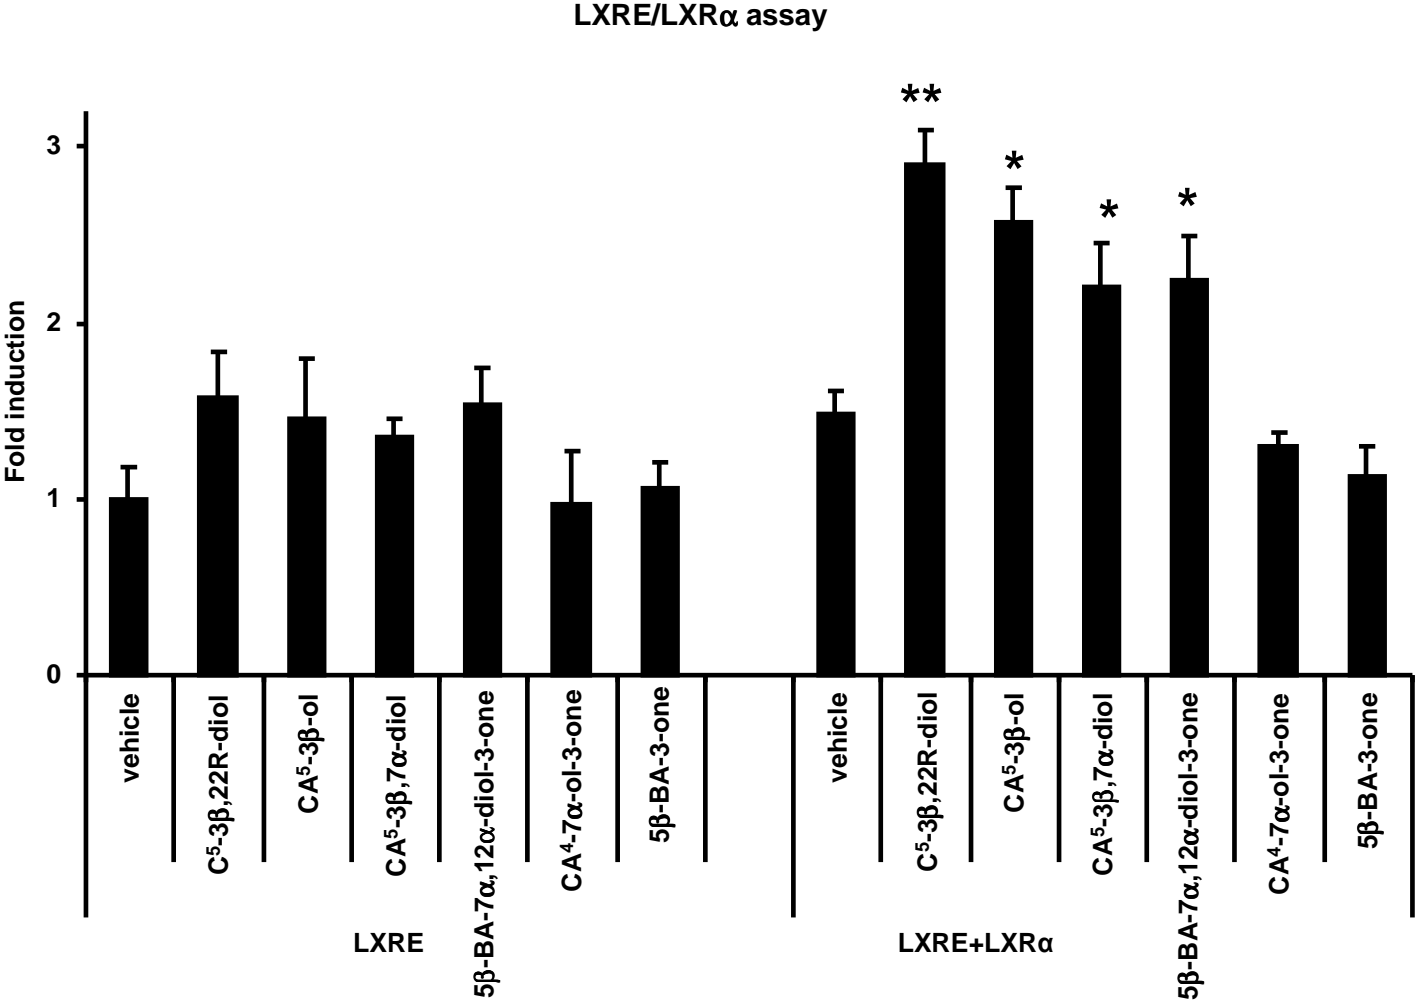

Fig. S2b

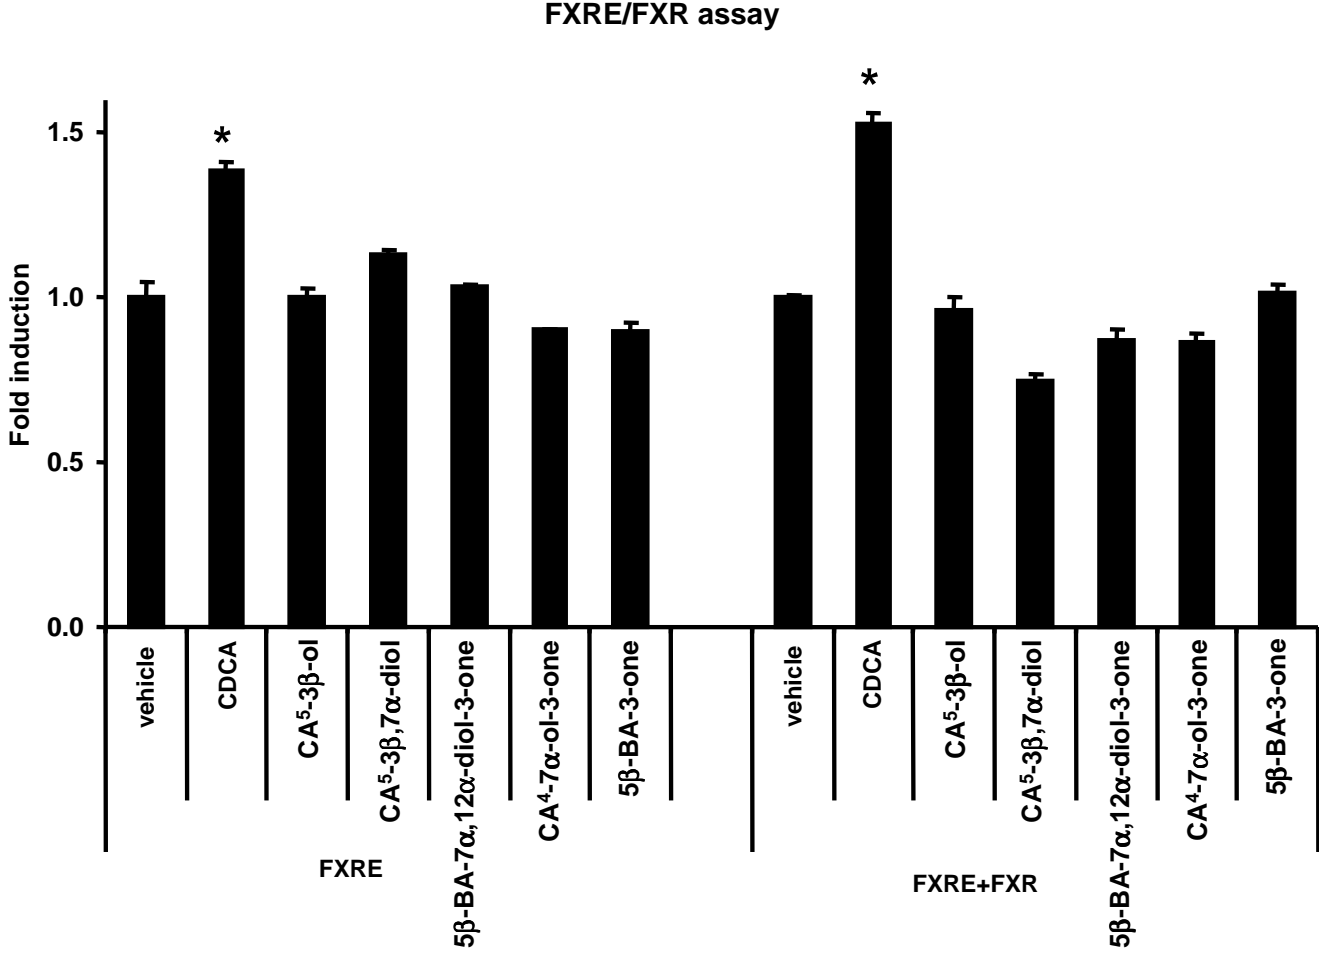

Fig. S2c

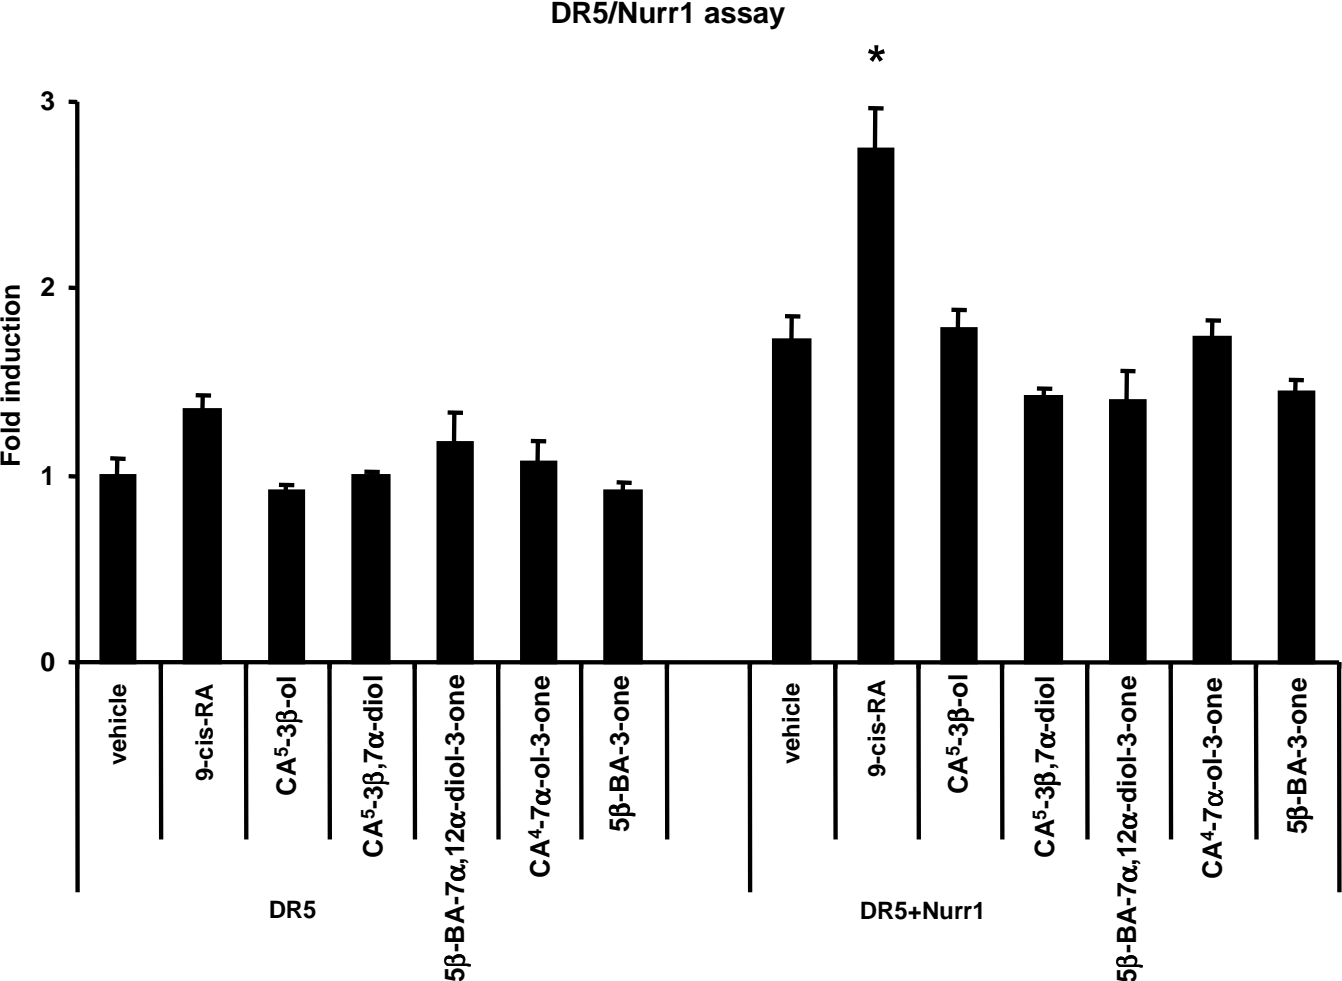

Supplement: supp_M109.086678_jbc.M109.086678-2.pdf [file supp_M109.086678_jbc.M109.086678-2.pdf]
